# Supplementary material for: Literature Based Drug Interaction Prediction with Clinical Assessment Using Electronic Medical Records: Novel Myopathy Associated Drug Interactions
Source: PLoS Comput Biol. 2012 Aug 9;8(8):e1002614. doi: 10.1371/journal.pcbi.1002614 (PMC3415435; doi:10.1371/journal.pcbi.1002614)
Supplement: Table S6 — Myopathy Concept IDs in the Common Data Model. (XLS) [file pcbi.1002614.s007.xlsx]

## Sheet: Concept Codes
concept_id	concept_name	concept_vocabulary_code	concept_level	concept_code
73001	Myositis	1	2	26889001
79908	Muscle weakness	1	2	26544005
80800	Polymyositis	1	2	31384009
439142	Myoglobinuria	1	1	48165008
4001805	Myositis unspecified	1	1	203110007
4011037	[D]Myoglobinuria	1	0	207318008
4140389	March myoglobinuria	1	1	33033006
4207805	Idiopathic myoglobinuria	1	1	5523002
4218766	Exertional rhabdomyolysis	01	2	72960004
4230337	Rhabdomyolysis	01	0	89010004
4344138	Traumatic rhabdomyolysis	01	1	240125008
4344140	Non-traumatic rhabdomyolysis	01	1	240132004
4345578	Rhabdomyolysis	01	2	240131006
4147768	Myopathy, unspecified	2	1	359.9
4147768	Myopathy, unspecified	2	1	359.9
4217978	Myalgia and myositis, unspecified	2	1	729.1
4218609	Muscle weakness (generalized)	2	1	728.87
4240118	Polymyositis	2	1	710.4
4244909	Myoglobinuria	2	1	791.3
4248141	Rhabdomyolysis	02	1	728.88
4262118	Other myopathies	2	1	359.8
4262436	Toxic myopathy	2	1	359.4
4324178	Antilipemic and antiarteriosclerotic drugs causing adverse effects in therapeutic use	2	1	E942.2
4344413	Myoglobinuria	7	0	N0000002090
4345083	Rhabdomyolysis	07	0	N0000002626
4345512	Polymyositis	7	3	N0000003568
4346672	Muscle Weakness	7	3	N0000003878
4347019	Myositis	7	3	N0000002094
4355369	Muscle Weakness	7	3	N0000003878
35205334	Myoglobinuria	15	2	10028629
35228229	Myoglobinuria	15	1	10028629
36009829	Polymyositis	15	2	10036102
36045641	Polymyositis	15	1	10036102
36211176	Myopathy toxic	15	2	10028648
36252554	Myopathy toxic	15	1	10028648
36503278	Muscle weakness conditions	15	3	10062913
36516833	Myositis	15	2	10028653
36516835	Myositis-like syndrome	15	2	10028654
36516886	Myopathy	15	2	10028641
36516888	Rhabdomyolysis	15	2	10039020
36569469	Myositis	15	1	10028653
36569474	Myositis-like syndrome	15	1	10028654
36569696	Muscle weakness	15	1	10028350
36569708	Generalised muscle weakness	15	1	10062571
36569709	Generalized muscle weakness	15	1	10062572
36569740	Myopathy	15	1	10028641
36569744	Myopathy, unspecified	15	1	10028649
36569756	Rhabdomyolysis	15	1	10039020
37080782	Rhabdomyolysis-induced renal failure	15	1	10050996
84675	Myalgia and myositis, unspecified	53	1	729.1
446370	Antilipemic and antiarteriosclerotic drugs causing adverse effects in therapeutic use	53	1	E942.2
37690084	Myopathy unspecified	53	1	359.9
37690442	Mylagia and myositis unspecified	53	1	729.1
37691586	Muscle weakness	53	1	26544005

## Sheet: Only for inpt scenarios
4242326	Unspecified disorder of muscle, ligament, and fascia	2	1	728.9
